# Supplementary material for: Generating a skeleton reaction network for reactions of large-scale ReaxFF MD pyrolysis simulations based on a machine learning predicted reaction class
Source: Royal Society of Chemistry journal article supplement (doi:10.1039/d3cp05935a), 2024-01-01
Supplement: d3cp05935a1.pdf [file d3cp05935a1.pdf]

# Generating skeleton reaction network for reactions of large-scale ReaxFF MD pyrolysis simulations based on machine learning predicted reaction class

Shanwen Yang,<sup>a,b</sup> Xiaoxia Li,<sup>a,b,c,\*</sup> Mo Zheng<sup>a,b,c</sup> Chunxing Ren,<sup>a,b,c</sup> and Li Guo<sup>a,b,c</sup>

<sup>a</sup>State Key Laboratory of Multiphase Complex Systems, Institute of Process Engineering, Chinese Academy of Sciences, Beijing 100190, P. R. China

<sup>b</sup>School of Chemical Engineering, University of Chinese Academy of Sciences, Beijing 100049, P. R. China

<sup>c</sup>Innovation Academy for Green Manufacture, Chinese Academy of Sciences, Beijing 100190, P. R. China

E-mail: [xxia@ipe.ac.cn](mailto:xxia@ipe.ac.cn)

## SUPPORTING INFORMATION

### Supplementary materials S1

**Table S1.1 Reactions classes (RxC) of hydrocarbon pyrolysis defined for the classification of ReaxFF MD simulated reactions in SRG-Reax**

| RxC | RxC name                            | Reaction instances                                                                  | Reaction depiction & Classification priority note                                                                         | Reaction class group                                               |
|-----|-------------------------------------|-------------------------------------------------------------------------------------|---------------------------------------------------------------------------------------------------------------------------|--------------------------------------------------------------------|
| 1   | C-C bond homolysis                  | 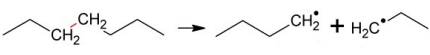 | Homolysis of C-C at varied positions<br>H <sub>2</sub> formed at high temperatures is unstable, which may cleavage into H | I.                                                                 |
| 2   | H-H bond homolysis                  |  |                                                                                                                           | Homolysis                                                          |
| 3   | $\beta$ -scission                   |  | $\beta$ -scission of radicals at varied positions                                                                         | II.                                                                |
| 4   | $\alpha$ -scission                  |  | Infrequent reaction at high temperature                                                                                   | Carbon chain breaks induced by radicals, including chain branching |
| 5   | Intra-molecular chain isomerization |  | Intra-molecular isomerization may lead to branching                                                                       |                                                                    |
| 6   | Intra-molecular H-shift             |  | H-shift may occur to its neighbor C atom or other C atoms                                                                 | III.<br>Intra-molecular H-shift on a                               |

|    |                                              | carbon chain                                                                                                                                                           |                                                                                                                    |
|----|----------------------------------------------|------------------------------------------------------------------------------------------------------------------------------------------------------------------------|--------------------------------------------------------------------------------------------------------------------|
| 7  | H detachment                                 | 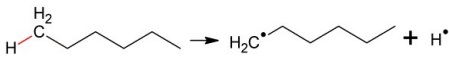                                                                                      |                                                                                                                    |
| 8  | H <sub>2</sub> formation via dehydrogenation | <br> | IV.<br>Dehydrogenation of a carbon chain                                                                           |
| 9  | Inter-molecular H-abstraction by C           |                                                                                       |                                                                                                                    |
| 10 | H-abstraction by H                           |                                                                                       | V.<br>H-abstraction of a carbon chain                                                                              |
| 11 | H-abstraction of H <sub>2</sub> by C         | <br> | High-temperature reaction due to H <sub>2</sub> unstableness, where H <sub>2</sub> is considered as C <sub>0</sub> |
| 12 | H radical addition to C                      |                                                                                       |                                                                                                                    |
| 13 | Recombination of C radicals                  |                                                                                     | VI.<br>Radical consumption                                                                                         |
| 14 | Combination of H radicals                    | $H^{\bullet} + H^{\bullet} \rightarrow H-H$                                                                                                                            |                                                                                                                    |
| 15 | Isopropyl detachment                         |                                                                                     | Isopropyl detachment induced by C chain radical                                                                    |
| 16 | Detachment of isopropyl radical              |                                                                                     | Isopropyl detachment induced by isopropyl radical                                                                  |
| 17 | $\alpha$ -branched bond scission of C ring   |                                                                                     | VIII.<br>Neighboring branch bond scission of $\alpha$ - and $\beta$ - for carbon cyclics                           |
| 18 | $\beta$ -branched bond scission of C ring    |                                                                                     |                                                                                                                    |
| 19 | Branch shift of C ring                       |                                                                                     | Reconnection of the dropped side chain to other C of same ring                                                     |
| 20 | Polycyclic bridge cleavage into a large ring |                                                                                     | The type of polycyclic bridge cleavage has higher priority than ring opening                                       |
| 21 | Adjacent C-C ring bond cleavage of           |                                                                                     | IX.<br>Ring-opening: relevant to the bridge bond of polycyclics                                                    |

polycyclic bridge  
bond

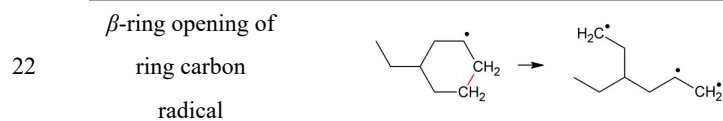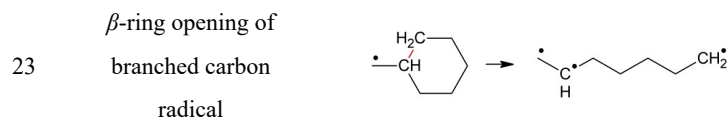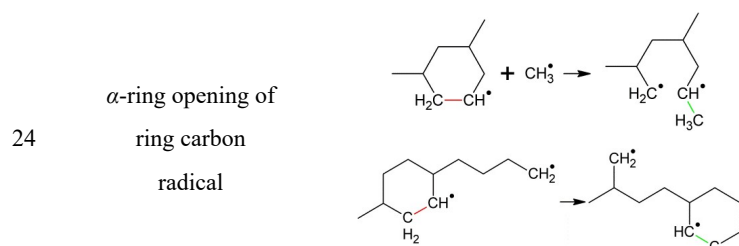

Infrequent reaction ( $\alpha$ -ring opening of ring carbon radical tends to its recombination with other C radical)

X.  
Ring-opening:  
induced by radical

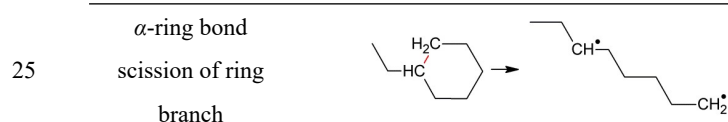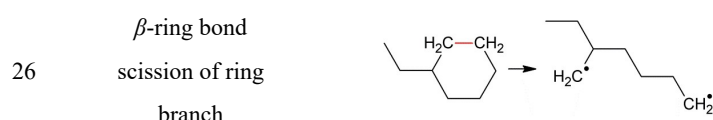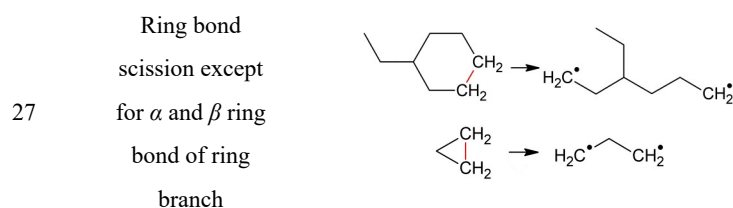

Ring-opening at ring C neighboring to branching C

XI.  
Ring-opening:  
relative to the position of the branched chain, its priority is lower than the reaction types of Groups IX and X.

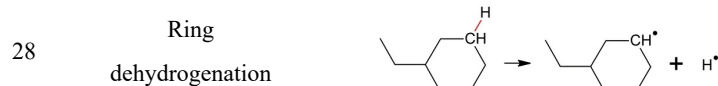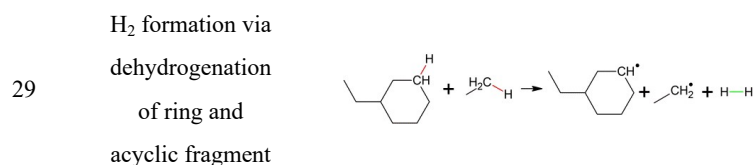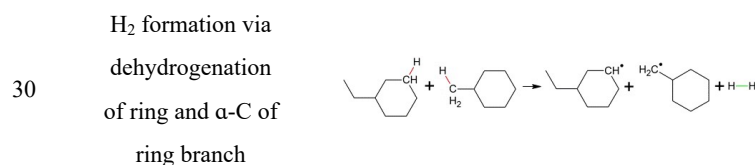

Dehydrogenation of C-H on a ring

$H_2$  formation of ring H with H from acyclic dehydrogenation

This type focuses on ring branch dehydrogenation of  $\alpha$ -C, which tends to consequent ring opening.

Ring branch dehydrogenation of  $\beta/\gamma$ -C will be classified into Type 29.

XII.  
Cyclic-relevant dehydrogenation

|    |                                                                                         |                                                                                                                                                                                      |                                                                                                 |
|----|-----------------------------------------------------------------------------------------|--------------------------------------------------------------------------------------------------------------------------------------------------------------------------------------|-------------------------------------------------------------------------------------------------|
| 31 | H <sub>2</sub> formation via dehydrogenation of α-C of ring branch and acyclic fragment | $\text{C}_6\text{H}_{11}\text{CH}_2\text{CH}_3 + \text{H}_2\text{C}-\text{H} \rightarrow \text{C}_6\text{H}_{10}\text{CH}_2\text{CH}_3 + \text{CH}_2=\text{H}_2 + \text{H}-\text{H}$ |                                                                                                 |
| 32 | Cyclic H-abstraction by H                                                               | $\text{C}_6\text{H}_{11}\text{CH}_2\text{CH}_3 + \text{H}^\bullet \rightarrow \text{C}_6\text{H}_{10}\text{CH}_2\text{CH}_3 + \text{H}-\text{H}$                                     |                                                                                                 |
| 33 | H-abstraction of α-C on ring branch by H                                                | $\text{C}_6\text{H}_{10}\text{CH}_2\text{CH}_3 + \text{H}^\bullet \rightarrow \text{C}_6\text{H}_9\text{CH}_2\text{CH}_3 + \text{H}-\text{H}$                                        |                                                                                                 |
| 34 | Cyclic H-abstraction by acyclic radical                                                 | $\text{C}_6\text{H}_{11}\text{CH}_2\text{CH}_3 + \text{CH}_3\text{CH}_2^\bullet \rightarrow \text{C}_6\text{H}_{10}\text{CH}_2\text{CH}_3 + \text{CH}_3\text{CH}_3$                  | XIII.<br>Cyclic-relevant H-abstraction                                                          |
| 35 | Acyclic H-abstraction by ring radical                                                   | $\text{C}_6\text{H}_{10}\text{CH}_2\text{CH}_3 + \text{H}_2\text{C}-\text{H} \rightarrow \text{C}_6\text{H}_{11}\text{CH}_2\text{CH}_3 + \text{CH}_2^\bullet-\text{H}$               |                                                                                                 |
| 36 | Intra-ring H-shift                                                                      | $\text{C}_6\text{H}_{10}\text{CH}_2\text{CH}_3 \rightarrow \text{C}_6\text{H}_{10}\text{CH}_2\text{CH}_3$                                                                            |                                                                                                 |
| 37 | Ring branch H-shift to ring                                                             | $\text{C}_6\text{H}_{10}\text{CH}_2\text{CH}_3 \rightarrow \text{C}_6\text{H}_{10}\text{CH}_2\text{CH}_3$                                                                            | XIV.<br>Cyclic-relevant H-shift                                                                 |
| 38 | Ring H-shift to ring branch                                                             | $\text{C}_6\text{H}_{10}\text{CH}_2\text{CH}_3 \rightarrow \text{C}_6\text{H}_{10}\text{CH}_2\text{CH}_3$                                                                            |                                                                                                 |
| 39 | Ring increment via branch linked to host ring                                           | $\text{C}_6\text{H}_{10}\text{CH}_2\text{CH}_3 \rightarrow \text{C}_6\text{H}_{10}\text{CH}_2\text{CH}_3$                                                                            |                                                                                                 |
| 40 | Ring increment via intra-ring carbons connecting                                        | $\text{C}_6\text{H}_{10}\text{CH}_2\text{CH}_3 \rightarrow \text{C}_6\text{H}_{10}\text{CH}_2\text{CH}_3$                                                                            | XV.<br>Formation and isomerization of ring structures, a possible pathway for aryl ring opening |
| 41 | Ring opening and recombination                                                          | $\text{C}_6\text{H}_{10}\text{CH}_2\text{CH}_3 \rightarrow \text{C}_6\text{H}_{10}\text{CH}_2\text{CH}_3$                                                                            |                                                                                                 |
| 42 | Chain cyclization                                                                       | $\text{C}_6\text{H}_{10}\text{CH}_2\text{CH}_3 \rightarrow \text{C}_6\text{H}_{10}\text{CH}_2\text{CH}_3$                                                                            | Similar to chain isomerization                                                                  |
|    |                                                                                         |                                                                                                                                                                                      | Chain isomerization into a ring via connecting of intra-chain carbon                            |

|    |                                                       |                                                                                   |                                                                 |
|----|-------------------------------------------------------|-----------------------------------------------------------------------------------|-----------------------------------------------------------------|
| 43 | Combination of aromatic carbon and C radical fragment | 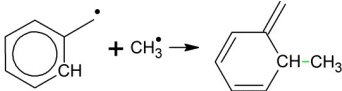 | XVI.<br>Aromatic ring $\pi$ structure broken                    |
| 44 | Combination of aromatic carbon and H                  |  | by aromatic carbon joining other structural fragments or atoms, |
| 45 | H-abstraction by aromatic carbon                      |  | a possible pathway for aryl ring opening                        |
| 46 | H-shift from branched-chain to host aromatic ring     |  |                                                                 |

**Table S1.2 Fuel models, ReaxFF MD pyrolysis simulation conditions covered, and reaction analysis parameters of VARxMD for preparing reaction data set**

| Fuel model                          | Simulation condition                                                      |                             |                                                                                            |
|-------------------------------------|---------------------------------------------------------------------------|-----------------------------|--------------------------------------------------------------------------------------------|
|                                     | (Isothermal simulation using NVT ensemble, simulation time-step = 0.1 fs) |                             |                                                                                            |
|                                     | Simulation temperature (K)                                                | Reaction duration time (ps) | Sampling interval of ReaxFF MD simulation / Output frame interval for VARxMD analysis (ps) |
| <i>n</i> -dodecane                  | 2000                                                                      | 250                         | 0.25                                                                                       |
|                                     | 2500                                                                      | 250                         | 0.25                                                                                       |
|                                     | 3000                                                                      | 250                         | 0.25                                                                                       |
| 3-component surrogate model of RP-3 | 2800                                                                      | 270                         | 1                                                                                          |
| 4-component surrogate model of RP-3 | 2800                                                                      | 270                         | 1                                                                                          |
| 45-component baseline model of RP-3 | 2800                                                                      | 270                         | 1                                                                                          |
| 24-component baseline model of RP-1 | 2800                                                                      | 250                         | 0.1                                                                                        |

## Supplementary materials S2

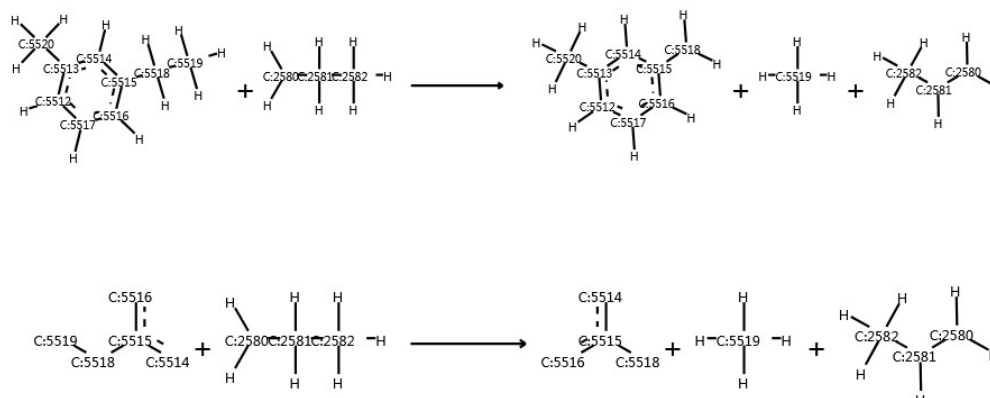

Manually judged reaction class:

Predicted class: 16

Atom pair IDs of bond breaking: '[[5518, 5519], [2581, 2601]]'

Atom pair IDs of bond formation: '[[2601, 5519]]'

SMARTS of extended reaction center: [cH:5514]:[c:5515](:[cH:5516])-[CH2:5518]-[CH3:5519].[CH2:2580]-[CH2:2581]-[CH3:2582]>>[cH:5514]:[c:5515](:[cH:5516])-[CH2:5518].[CH4:5519].[CH2:2580]-[CH:2581]-[CH3:2582]

SMARTS of full reaction: [#6:5512]1(<[#6:5513](-[#6:5514])(=[#6:5515](-[#6:5516])(=[#6:5517]-1-[H:5524])-[H:5523])-[#6:5518](-[#6:5519](-[H:5527])(-[H:5528])-[H:5529])(-[H:5525])-[H:5526])-[H:5522])-[#6:5520](-[H:5530](-[H:5531])-[H:5532])-[H:5521].[#6:2580](-[#6:2581](-[#6:2582](-[H:2602])(-[H:2603])-[H:2604])(-[H:2600])-[H:2601])(-[H:2598])-[H:2599])>[#6:5512]1(=[#6:5513](-[#6:5514])(=[#6:5515](-[#6:5516])(=[#6:5517]-1-[H:5524])-[H:5523])-[#6:5518](-[H:5525])-[H:5526])-[H:5522])-[#6:5520](-[H:5530](-[H:5531])-[H:5532])-[H:5521].[H:2601]-[#6:5519](-[H:5527])(-[H:5528])-[H:5529].[#6:2580](-[#6:2581](-[#6:2582](-[H:2602])(-[H:2603])-[H:2604])-[H:2600])(-[H:2598])-[H:2599])

Fig. S2 Manual check and labeling of high uncertainty predicted reactions in the active learning of SRG-Reax.

## Supplementary materials S3

Table S3.1 The reaction features in Input 1 of the tri-training classifier

| Reaction feature name                              | Feature description                                                                     |
|----------------------------------------------------|-----------------------------------------------------------------------------------------|
| <b>Features of broken or formed bond (Level 1)</b> |                                                                                         |
| BondType                                           | The type of broken or formed bond                                                       |
| IsAromatic                                         | Whether the broken or formed bond is an aromatic bond                                   |
| NumBridgedRings                                    | How many rings does the broken or formed bond belong to                                 |
| BondOrderReaxFF                                    | The bond order of broken or formed bond                                                 |
| FunctionalGroups                                   | The functional group types that the formed or broken bond belongs to                    |
| <b>Atom features of reaction site (Level 2)</b>    |                                                                                         |
| Mass                                               | Relative atomic mass of a reaction site                                                 |
| NumRadicalElectrons                                | The number of radical electrons a reaction site has                                     |
| Degree                                             | The number of atoms connected to a reaction site (excluding those connected to H atoms) |
| TotalValence                                       | Total valence of a reaction site                                                        |
| IsAromatic                                         | Whether the reaction site is an aromatic atom                                           |

|                                                                            |                                                                                                                                                                                              |
|----------------------------------------------------------------------------|----------------------------------------------------------------------------------------------------------------------------------------------------------------------------------------------|
| NumBridgedRings                                                            | The number of rings a reaction site belongs to                                                                                                                                               |
| TotalNumHs                                                                 | Number of H atoms connected to the reaction site                                                                                                                                             |
| GasteigerCharges                                                           | Gasteiger charges of a reaction site                                                                                                                                                         |
| CrippenContribs                                                            | The relative contributions of a reaction site in a molecule calculated by considering the chemical environment surrounding the reaction site and the interactions between neighboring atoms. |
| LabuteASACContribs                                                         | The solvent-accessible surface area (SASA) contributions of the reaction site in a molecule                                                                                                  |
| TPSACContribs                                                              | The contribution of a reaction site to the topological polar surface area (TPSA) of a molecule                                                                                               |
| NumPiElectrons                                                             | The number of $\pi$ electrons of a reaction site                                                                                                                                             |
| NumLonePairElectronsReaxFF                                                 | The number of lone pair electrons in a reaction site                                                                                                                                         |
| NetChargeReaxFF                                                            | The net charge of a reaction site                                                                                                                                                            |
| TotalBondOrderReaxFF                                                       | The total bond order of all covalent bonds associated with the reaction site                                                                                                                 |
| <b>Features of all neighbor structures of broken/formed bond (Level 3)</b> |                                                                                                                                                                                              |
| NumRadicalElectrons                                                        | The total number of radical electrons that all neighbor atoms of a broken/formed bond have                                                                                                   |
| NumPiElectrons                                                             | The total number of $\pi$ electrons of all neighbor atoms of a broken/formed bond                                                                                                            |
| NumRingAtoms                                                               | The total number of rings that all neighbor atoms of a broken/formed bond belong to                                                                                                          |
| NumNonRingRadicals                                                         | The total number of radical electrons that all non-cyclic neighbor atoms of a broken/formed bond have                                                                                        |
| FunctionalGroups                                                           | The functional group types that all neighbor atoms of a broken/formed bond belong to                                                                                                         |
| <b>Features of full reaction (Level 4)</b>                                 |                                                                                                                                                                                              |
| NumBrokenBonds                                                             | Number of broken bonds                                                                                                                                                                       |
| NumFormedBonds                                                             | Number of formed bonds                                                                                                                                                                       |
| NumReactiveAtomsInReactants                                                | Number of non-H reaction sites in reactants                                                                                                                                                  |
| NumReactiveAtomsInProducts                                                 | Number of non-H reaction sites in products                                                                                                                                                   |
| NumReactantFragments                                                       | Number of reactant fragments                                                                                                                                                                 |
| NumProductFragments                                                        | Number of product fragments                                                                                                                                                                  |

**Table S3.2 The definitions of the 18 full reaction features in Input 3 of the tri-training classifier**

| <b>Reaction feature name</b> | <b>Feature description</b>                                 |
|------------------------------|------------------------------------------------------------|
| NumReactantFragments         | Number of reactant fragments                               |
| NumProductFragments          | Number of product fragments                                |
| NumBrokenBonds               | Number of broken bonds                                     |
| NumGenerateBonds             | Number of formed bonds                                     |
| NumReactAtomsInReactants     | Number of reaction site in reactants (Non-implicit H atom) |
| NumReactAtomsInProducts      | Number of reaction site in products (Non-implicit H atom)  |

|                                      |                                                                     |
|--------------------------------------|---------------------------------------------------------------------|
| NumAromaticBrokenBonds               | Number of aromatic broken bonds                                     |
| NumAromaticFormedBonds               | Number of aromatic formed bonds                                     |
| NumBrokenRingBonds                   | Number of broken bonds of ring structures                           |
| NumFormedRingBonds                   | Number of formed bonds of ring structures                           |
| NumRadicalElectronsOfRxnSitesInReact | The total number of radical electrons of reaction site in reactants |
| NumRadicalElectronsOfRxnSitesInProd  | The total number of radical electrons of reaction site in products  |
| NumAromaticAtomsOfRxnSitesInReact    | The total number of aromatic reaction site in reactants             |
| NumAromaticAtomsOfRxnSitesInProd     | The total number of aromatic reaction site in products              |
| NumRingAtomsOfRxnSitesInReact        | Number of reaction site of ring structures in reactants             |
| NumRingAtomsOfRxnSitesInProd         | Number of reaction site of ring structures in products              |
| NumPiElectronsOfRxnSitesInReact      | The total number of $\pi$ electrons of reaction sites in reactants  |
| NumPiElectronsOfRxnSitesInProd       | The total number of $\pi$ electrons of reaction sites in products   |

**Table S3.3 Details of 196 reaction features in vector of Input 1 highlighted in Fig. 4**

**# 0–5 full reaction features of Level 4**

*'NumReactantFragments','NumProductFragments','NumBrokenBonds','NumFormedBonds','NumReactiveAtomsInReactants','NumReactiveAtomsInProducts'*

**# Bond breaking**

**# 6–17 1st broken bond (BB1)**

**# bond (B) features of Level 1**

*,'BB1\_B\_BondType','BB1\_B\_IsAromatic','BB1\_B\_NumBridgedRings','BB1\_B\_BondOrderReaxFF','BB1\_B\_FunctionalGroup'*

**# its environment (E) structure features of Level 3**

*,'BB1\_E\_NumRadicalElectrons','BB1\_E\_NumPiElectrons','BB1\_E\_NumRingAtoms','BB1\_E\_NumNonRingRadicals','BB1\_E\_FunctionalGroupType1','BB1\_E\_FunctionalGroupType2','BB1\_E\_FunctionalGroupType3'*

**# 18–29 2nd broken bond (BB2)**

**# bond (B) features of Level 1**

*,'BB2\_B\_BondType','BB2\_B\_IsAromatic','BB2\_B\_NumBridgedRings','BB2\_B\_BondOrderReaxFF','BB2\_B\_FunctionalGroup'*

**# its environment (E) structure features of Level 3**

*,'BB2\_E\_NumRadicalElectrons','BB2\_E\_NumPiElectrons','BB2\_E\_NumRingAtoms','BB2\_E\_NumNonRingRadicals','BB2\_E\_FunctionalGroupType1','BB2\_E\_FunctionalGroupType2','BB2\_E\_FunctionalGroupType3'*

**# Bond formation**

**# 30–37 1st formed bond (FB1)**

**# bond (B) features of Level 1**

*,'FB1\_B\_BondType','FB1\_B\_IsAromatic','FB1\_B\_NumBondRings','FB1\_B\_BondOrder'*

**# its environment (E) structure features of Level 3**

*,'FB1\_E\_NumRadicalElectrons','FB1\_E\_NumPiElectrons','FB1\_E\_NumAtomRings','FB1\_E\_NumNonRingRadicals'*

**# 38–45 2nd formed bond (FB2)**

**# bond (B) features of Level 1**

*,'FB2\_B\_BondType','FB2\_B\_IsAromatic','FB2\_B\_NumBondRings','FB2\_B\_BondOrder'*

**# its environment (E) structure features of Level 3**



*,'FB2\_E\_NumRadicalElectrons','FB2\_E\_NumPiElectrons','FB2\_E\_NumAtomRings','FB2\_E\_NumNonRingRadicals'*

**# Atoms of reaction sites in reactants**

**# 46–60 atom features of the 1st reaction site (BA1) in reactants of Level 2**

*,'BA1\_Mass','BA1\_NumRadicalElectrons','BA1\_Degree','BA1\_TotalValence','BA1\_IsAromatic','BA1\_NumBridgedRings','BA1\_TotalNumHs','BA1\_GasteigerCharges','BA1\_CrippenContribs','BA1\_LabuteASAContribs','BA1\_TPSAContribs','BA1\_NumPiElectrons','BA1\_NumLonePairElectronsReaxFF','BA1\_NetChargeReaxFF','BA1\_TotalBondOrderReaxFF'*

**# 61–75 atom features of the 2nd reaction site (BA2) in reactants of Level 2**

*,'BA2\_Mass','BA2\_NumRadicalElectrons','BA2\_Degree','BA2\_TotalValence','BA2\_IsAromatic','BA2\_NumBridgedRings','BA2\_TotalNumHs','BA2\_GasteigerCharges','BA2\_CrippenContribs','BA2\_LabuteASAContribs','BA2\_TPSAContribs','BA2\_NumPiElectrons','BA2\_NumLonePairElectronsReaxFF','BA2\_NetChargeReaxFF','BA2\_TotalBondOrderReaxFF'*

**# 76–90 atom features of the 3rd reaction site (BA3) in reactants of Level 2**

*,'BA3\_Mass','BA3\_NumRadicalElectrons','BA3\_Degree','BA3\_TotalValence','BA3\_IsAromatic','BA3\_NumBridgedRings','BA3\_TotalNumHs','BA3\_GasteigerCharges','BA3\_CrippenContribs','BA3\_LabuteASAContribs','BA3\_TPSAContribs','BA3\_NumPiElectrons','BA3\_NumLonePairElectronsReaxFF','BA3\_NetChargeReaxFF','BA3\_TotalBondOrderReaxFF'*

**# 91–105 atom features of the 4th reaction site (BA4) in reactants of Level 2**

*,'BA4\_Mass','BA4\_NumRadicalElectrons','BA4\_Degree','BA4\_TotalValence','BA4\_IsAromatic','BA4\_NumBridgedRings','BA4\_TotalNumHs','BA4\_GasteigerCharges','BA4\_CrippenContribs','BA4\_LabuteASAContribs','BA4\_TPSAContribs','BA4\_NumPiElectrons','BA4\_NumLonePairElectronsReaxFF','BA4\_NetChargeReaxFF','BA4\_TotalBondOrderReaxFF'*

**# 106–120 atom features of the 5th reaction site (BA5) in reactants of Level 2**

*,'BA5\_Mass','BA5\_NumRadicalElectrons','BA5\_Degree','BA5\_TotalValence','BA5\_IsAromatic','BA5\_NumBridgedRings','BA5\_TotalNumHs','BA5\_GasteigerCharges','BA5\_CrippenContribs','BA5\_LabuteASAContribs','BA5\_TPSAContribs','BA5\_NumPiElectrons','BA5\_NumLonePairElectronsReaxFF','BA5\_NetChargeReaxFF','BA5\_TotalBondOrderReaxFF'*

**# Atoms of reaction sites in products**

**# 121–135 atom features of the 1st reaction site (FA1) in products of Level 2**

*,'FA1\_Mass','FA1\_NumRadicalElectrons','FA1\_Degree','FA1\_TotalValence','FA1\_IsAromatic','FA1\_NumBridgedRings','FA1\_TotalNumHs','FA1\_GasteigerCharges','FA1\_CrippenContribs','FA1\_LabuteASAContribs','FA1\_TPSAContribs','FA1\_NumPiElectrons','FA1\_NumLonePairElectronsReaxFF','FA1\_NetChargeReaxFF','FA1\_TotalBondOrderReaxFF'*

**# 136–150 atom features of the 2nd reaction site (FA2) in products of Level 2**

*,'FA2\_Mass','FA2\_NumRadicalElectrons','FA2\_Degree','FA2\_TotalValence','FA2\_IsAromatic','FA2\_NumBridgedRings','FA2\_TotalNumHs','FA2\_GasteigerCharges','FA2\_CrippenContribs','FA2\_LabuteASAContribs','FA2\_TPSAContribs','FA2\_NumPiElectrons','FA2\_NumLonePairElectronsReaxFF','FA2\_NetChargeReaxFF','FA2\_TotalBondOrderReaxFF'*

**# 151–165 atom features of the 3rd reaction site (FA3) in products of Level 2**

*,'FA3\_Mass','FA3\_NumRadicalElectrons','FA3\_Degree','FA3\_TotalValence','FA3\_IsAromatic','FA3\_NumBridgedRings','FA3\_TotalNumHs','FA3\_GasteigerCharges','FA3\_CrippenContribs','FA3\_LabuteASAContribs','FA3\_TPSAContribs','FA3\_NumPiElectrons','FA3\_NumLonePairElectronsReaxFF','FA3\_NetChargeReaxFF','FA3\_TotalBondOrderReaxFF'*

**# 166–180 atom features of the 4th reaction site (FA4) in products of Level 2**

*,'FA4\_Mass','FA4\_NumRadicalElectrons','FA4\_Degree','FA4\_TotalValence','FA4\_IsAromatic','FA4\_NumBridgedRings','FA4\_TotalNumHs','FA4\_GasteigerCharges','FA4\_CrippenContribs','FA4\_LabuteASAContribs','FA4\_TPSAContribs','FA4\_NumPiElectrons','FA4\_NumLonePairElectronsReaxFF','FA4\_NetChargeReaxFF','FA4\_TotalBondOrderReaxFF'*

**# 181–195 atom features of the 5th reaction site (FA5) in products of Level 2**

, 'FA5\_Mass', 'FA5\_NumRadicalElectrons', 'FA5\_Degree', 'FA5\_TotalValence', 'FA5\_IsAromatic', 'FA5\_NumBridgedRings', 'FA5\_TotalNumHs', 'FA5\_GasteigerCharges', 'FA5\_CrippenContribs', 'FA5\_LabuteASAContribs', 'FA5\_TPSAContribs', 'FA5\_NumPiElectrons', 'FA5\_NumLonePairElectronsReaxFF', 'FA5\_NetChargeReaxFF', 'FA5\_TotalBondOrderReaxFF'

**Table S3.4 Sample data of the 18 types of reaction descriptors**

| RxC | Sample reactions                                                                    | 18 reaction features of Input 3 |   |   |   |   |   |   |   |   |    |    |    |    |    |    |    |    |    |
|-----|-------------------------------------------------------------------------------------|---------------------------------|---|---|---|---|---|---|---|---|----|----|----|----|----|----|----|----|----|
|     |                                                                                     | 1                               | 2 | 3 | 4 | 5 | 6 | 7 | 8 | 9 | 10 | 11 | 12 | 13 | 14 | 15 | 16 | 17 | 18 |
| 1   |    | 1                               | 2 | 1 | 0 | 2 | 2 | 0 | 0 | 0 | 0  | 0  | 2  | 0  | 0  | 0  | 0  | 0  | 0  |
| 2   |    | 1                               | 2 | 1 | 0 | 2 | 2 | 0 | 0 | 0 | 0  | 0  | 2  | 0  | 0  | 0  | 0  | 0  | 0  |
| 3   |    | 1                               | 2 | 1 | 0 | 2 | 2 | 0 | 0 | 0 | 0  | 0  | 2  | 0  | 0  | 0  | 0  | 0  | 0  |
| 5   |    | 1                               | 1 | 1 | 1 | 3 | 3 | 0 | 0 | 0 | 0  | 1  | 1  | 0  | 0  | 0  | 0  | 0  | 0  |
| 5   |    | 1                               | 1 | 1 | 1 | 3 | 3 | 0 | 0 | 0 | 0  | 4  | 4  | 0  | 0  | 0  | 0  | 0  | 0  |
| 6   |    | 1                               | 1 | 1 | 1 | 2 | 2 | 0 | 0 | 0 | 0  | 1  | 1  | 0  | 0  | 0  | 0  | 0  | 0  |
| 7   |  | 1                               | 2 | 1 | 0 | 1 | 2 | 0 | 0 | 0 | 0  | 0  | 2  | 0  | 0  | 0  | 0  | 0  | 0  |
| 8   |  | 2                               | 3 | 2 | 1 | 2 | 4 | 0 | 0 | 0 | 0  | 0  | 2  | 0  | 0  | 1  | 1  | 0  | 0  |
| 9   |  | 2                               | 2 | 1 | 1 | 2 | 2 | 0 | 0 | 0 | 0  | 1  | 0  | 0  | 0  | 0  | 0  | 0  | 1  |
| 10  |  | 2                               | 2 | 1 | 1 | 2 | 3 | 0 | 0 | 0 | 0  | 2  | 2  | 0  | 0  | 0  | 0  | 0  | 0  |
| 11  |  | 2                               | 2 | 1 | 1 | 3 | 2 | 0 | 0 | 0 | 0  | 1  | 1  | 0  | 0  | 0  | 0  | 0  | 0  |
| 12  |  | 2                               | 1 | 0 | 1 | 2 | 1 | 0 | 0 | 0 | 1  | 1  | 0  | 0  | 0  | 1  | 1  | 1  | 0  |
| 13  |  | 2                               | 1 | 0 | 1 | 2 | 2 | 0 | 0 | 0 | 0  | 2  | 0  | 0  | 0  | 0  | 0  | 0  | 0  |
| 14  |  | 2                               | 1 | 0 | 1 | 2 | 2 | 0 | 0 | 0 | 0  | 2  | 0  | 0  | 0  | 0  | 0  | 0  | 0  |
| 15  |  | 1                               | 2 | 1 | 0 | 2 | 2 | 0 | 0 | 0 | 0  | 0  | 2  | 0  | 0  | 0  | 0  | 0  | 0  |
| 16  |  | 1                               | 2 | 1 | 0 | 2 | 2 | 0 | 0 | 0 | 0  | 1  | 3  | 0  | 0  | 0  | 0  | 0  | 0  |
| 17  |  | 1                               | 2 | 1 | 0 | 2 | 2 | 0 | 0 | 0 | 0  | 0  | 2  | 0  | 0  | 1  | 1  | 0  | 0  |

|    |                                                                                     |   |   |   |   |   |   |   |   |   |   |   |   |   |   |   |   |   |   |
|----|-------------------------------------------------------------------------------------|---|---|---|---|---|---|---|---|---|---|---|---|---|---|---|---|---|---|
| 18 |    | 1 | 2 | 1 | 0 | 2 | 2 | 0 | 0 | 0 | 0 | 0 | 2 | 0 | 0 | 0 | 0 | 0 | 0 |
| 19 |    | 1 | 1 | 1 | 1 | 3 | 3 | 0 | 0 | 1 | 1 | 1 | 0 | 0 | 0 | 2 | 2 | 2 | 3 |
| 20 |    | 1 | 1 | 1 | 0 | 2 | 2 | 0 | 0 | 1 | 0 | 0 | 0 | 0 | 0 | 4 | 2 | 2 | 4 |
| 21 |    | 1 | 1 | 1 | 0 | 2 | 2 | 0 | 0 | 0 | 0 | 0 | 2 | 0 | 0 | 3 | 1 | 0 | 0 |
| 22 |    | 1 | 1 | 1 | 0 | 2 | 2 | 0 | 0 | 1 | 0 | 0 | 2 | 0 | 0 | 2 | 0 | 0 | 0 |
| 23 |    | 1 | 1 | 1 | 0 | 2 | 2 | 0 | 0 | 1 | 0 | 0 | 2 | 0 | 0 | 2 | 0 | 0 | 0 |
| 25 |    | 1 | 1 | 1 | 0 | 2 | 2 | 0 | 0 | 0 | 0 | 0 | 2 | 0 | 0 | 2 | 0 | 0 | 0 |
| 26 |    | 1 | 1 | 1 | 0 | 2 | 2 | 0 | 0 | 0 | 0 | 0 | 2 | 0 | 0 | 2 | 0 | 0 | 0 |
| 27 |    | 1 | 1 | 1 | 0 | 2 | 2 | 0 | 0 | 1 | 0 | 0 | 2 | 0 | 0 | 2 | 0 | 0 | 0 |
| 28 |   | 1 | 2 | 1 | 0 | 1 | 2 | 0 | 0 | 0 | 0 | 0 | 2 | 0 | 0 | 1 | 1 | 0 | 0 |
| 29 |  | 2 | 3 | 2 | 1 | 2 | 4 | 0 | 0 | 0 | 0 | 0 | 2 | 0 | 0 | 1 | 1 | 0 | 0 |
| 30 |  | 2 | 3 | 2 | 1 | 2 | 4 | 0 | 0 | 1 | 0 | 0 | 2 | 0 | 0 | 1 | 1 | 0 | 0 |
| 31 |  | 2 | 3 | 2 | 2 | 3 | 5 | 0 | 0 | 0 | 0 | 1 | 1 | 0 | 0 | 0 | 2 | 0 | 0 |
| 33 |  | 2 | 2 | 1 | 1 | 2 | 3 | 0 | 0 | 0 | 0 | 1 | 1 | 0 | 0 | 0 | 0 | 0 | 0 |
| 34 |  | 2 | 2 | 1 | 1 | 2 | 2 | 0 | 0 | 0 | 0 | 1 | 1 | 0 | 0 | 1 | 1 | 0 | 0 |
| 35 |  | 2 | 2 | 1 | 1 | 2 | 2 | 0 | 0 | 0 | 1 | 0 | 2 | 0 | 0 | 1 | 1 | 2 | 0 |
| 36 |  | 1 | 1 | 1 | 1 | 2 | 2 | 0 | 0 | 1 | 1 | 0 | 3 | 0 | 0 | 2 | 2 | 3 | 0 |
| 37 |  | 1 | 1 | 1 | 1 | 2 | 2 | 0 | 0 | 1 | 0 | 1 | 1 | 0 | 0 | 1 | 1 | 0 | 0 |
| 39 |  | 1 | 1 | 0 | 1 | 2 | 2 | 0 | 0 | 0 | 0 | 2 | 0 | 0 | 0 | 1 | 3 | 0 | 0 |
| 40 |  | 1 | 1 | 0 | 1 | 2 | 2 | 0 | 0 | 0 | 0 | 2 | 0 | 0 | 0 | 2 | 4 | 0 | 0 |
| 41 |  | 1 | 1 | 1 | 1 | 3 | 3 | 0 | 0 | 1 | 0 | 1 | 1 | 0 | 0 | 2 | 3 | 0 | 0 |

|    |  |   |   |   |   |   |   |   |   |   |   |   |   |   |   |   |   |   |   |
|----|--|---|---|---|---|---|---|---|---|---|---|---|---|---|---|---|---|---|---|
| 42 |  | 1 | 1 | 0 | 1 | 2 | 2 | 0 | 0 | 0 | 0 | 2 | 0 | 0 | 0 | 0 | 2 | 0 | 0 |
| 43 |  | 2 | 1 | 0 | 1 | 2 | 2 | 0 | 0 | 0 | 0 | 1 | 0 | 1 | 0 | 1 | 1 | 1 | 0 |
| 44 |  | 2 | 1 | 0 | 1 | 2 | 1 | 0 | 0 | 0 | 1 | 1 | 0 | 1 | 0 | 1 | 1 | 1 | 0 |
| 44 |  | 2 | 1 | 0 | 1 | 2 | 1 | 0 | 0 | 0 | 1 | 1 | 0 | 1 | 0 | 1 | 1 | 1 | 0 |
| 45 |  | 2 | 2 | 1 | 1 | 2 | 2 | 0 | 0 | 0 | 1 | 0 | 1 | 1 | 0 | 1 | 1 | 1 | 0 |
| 46 |  | 1 | 1 | 1 | 1 | 2 | 2 | 0 | 0 | 1 | 0 | 0 | 1 | 1 | 0 | 1 | 1 | 1 | 0 |

## Supplementary materials S4

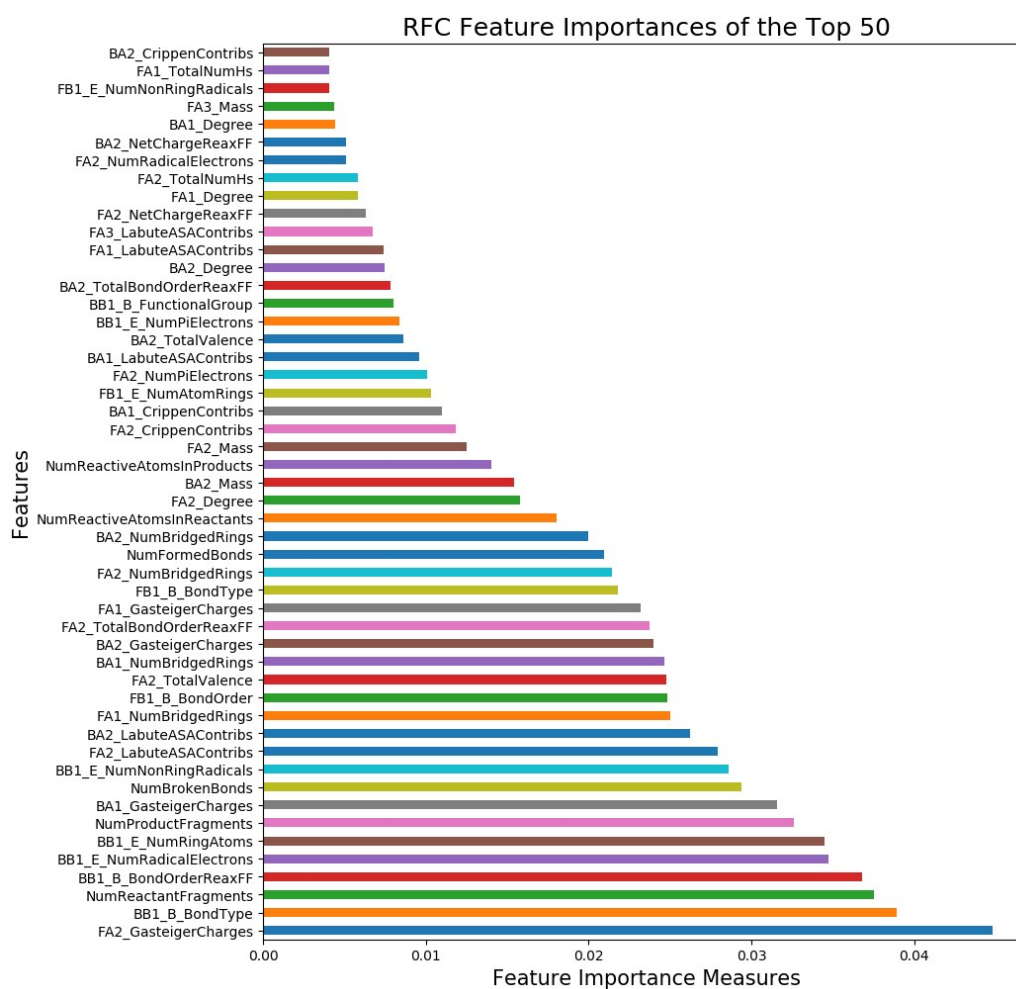

**Fig. S4** Feature importance of the top 50 among the 196 features of Input 1 of the single random forest classifier (RFC) adopted in the tri-training classifier.

**Table S4 Evaluation results of reaction fingerprint (FP) candidates for single classifier of tri-training based on random forest**

| Reaction descriptions                    |                     | Micro-F1 score with different FP bit size |       |              |              |       |       |
|------------------------------------------|---------------------|-------------------------------------------|-------|--------------|--------------|-------|-------|
| Input type                               | FP type             | 128                                       | 256   | 512          | 1024         | 2048  | 4096  |
| <b>Input 2</b>                           | AtomPairs           | 0.918                                     | 0.913 | 0.916        | 0.920        | 0.917 | 0.916 |
| $\sum$ FP of products                    | Morgan2             | 0.951                                     | 0.955 | 0.957        | <b>0.959</b> | 0.957 | 0.958 |
| $-\sum$ FP of reactants                  | TopologicalTorsions | 0.662                                     | 0.664 | 0.662        | 0.665        | 0.663 | 0.659 |
| <b>Input 3</b>                           | AtomPairs           | 0.932                                     | 0.932 | 0.933        | 0.931        | 0.932 | 0.932 |
| $(\sum$ ERC FP of products               | Morgan2             | 0.951                                     | 0.952 | <b>0.953</b> | 0.952        | 0.952 | 0.953 |
| $-\sum$ ERC FP of reactants)             | TopologicalTorsions | 0.928                                     | 0.927 | 0.928        | 0.928        | 0.927 | 0.928 |
| + 18 reaction features                   |                     |                                           |       |              |              |       |       |
| <b>Input 3 without reaction features</b> | AtomPairs           | 0.779                                     | 0.778 | 0.780        | 0.781        | 0.782 | 0.782 |
| $(\sum$ ERC FP of products               | Morgan2             | 0.910                                     | 0.915 | 0.915        | <b>0.916</b> | 0.915 | 0.915 |
| $-\sum$ ERC FP of reactants)             | TopologicalTorsions | 0.474                                     | 0.476 | 0.475        | 0.475        | 0.475 | 0.475 |

Supplementary materials S5
